# Supplementary material for: Development and validation of a predictive model of abnormal uterine bleeding associated with ovulatory dysfunction: a case-control study
Source: BMC Womens Health. 2023 Oct 12;23:536. doi: 10.1186/s12905-023-02589-5 (PMC10571233; doi:10.1186/s12905-023-02589-5)
Supplement: Supplementary file 2 — Additional file 2. [file 12905_2023_2589_MOESM2_ESM.xlsx]

## Sheet: AUB-O calculation
						A tool for AUB-O risk calculation
						Categorical variables Yes (1) / No (0)
		Predictor	β
		Age (year)	0.071			Age (year)	28
		BMI (kg/m2)	0.078			BMI (kg/m2)	24
		Systolic pressure (mmHg)	0.016			Systolic pressure (mmHg)	116
		Residence				Residence
		Urban				Urban	1
		Rural	0.896			Rural	0
		Diet				Diet
		With meat and vegetables				With meat and vegetables	1
		Meat-based diet	-0.002			Meat-based diet	0	Risk of AUB-O =	8.5411	%
		Plant-based diet	0.836			Plant-based diet	0
		Eat fruits				Eat fruits
		≥4 times per week				≥4 times per week	1
		<4 times per week	0.635			<4 times per week	0
		Daily sleep duration (hour)	-0.2			Daily sleep duration (hour)	8
		Parity				Parity
		0				0	0
		1	-0.858			1	1
		>1	-0.798			>1	0
		History of ovarian cyst				History of ovarian cyst
		No				No	1
		Yes	0.631			Yes	0
		Constant	-5.629
